# Supplementary material
Source: PubMed Central journal article supplement (PMC4779340)
Supplement: NIHMS667050-supplement-01.pdf [file NIHMS667050-supplement-01.pdf]

**Table S1**

Self-report items included in Social Anxiety and Depression TSO models

| <b>Item</b>      | <b>Social Anxiety TSO</b>                                                                 |
|------------------|-------------------------------------------------------------------------------------------|
| SPS#2            | I become self-conscious when using public                                                 |
| SPS#9            | I would get tense if I had to carry a tray across a crowded cafeteria                     |
| SPS#11           | I can feel conspicuous standing in a line                                                 |
| SPS#13           | I feel awkward and tense if I know people are watching me                                 |
| <b>SPS#1</b>     | <b>I became anxious if I have to write in front of other people</b>                       |
| <b>SPS#5</b>     | <b>I fear I may blush when I am with others</b>                                           |
| <b>SPS#7</b>     | <b>I would get tense if I had to sit facing other people on a bus or a train</b>          |
| <b>SPS#8</b>     | <b>It would make me feel self-conscious to eat in front of a stranger at a restaurant</b> |
|                  | <b><u>Depression TSO</u></b>                                                              |
| IDD #1           | Frequency/intensity of sadness                                                            |
| IDD #19          | Discouraged about the future                                                              |
| MASQ #22         | Felt hopeless                                                                             |
| MASQ #42         | Felt pessimistic about the future                                                         |
| MASQ #74         | Was disappointed in myself                                                                |
| <b>MASQ #8</b>   | <b>Felt discouraged</b>                                                                   |
| <b>MASQ #24</b>  | <b>Blamed myself for a lot of things</b>                                                  |
| <b>MASQ #26</b>  | <b>Felt withdrawn from other people</b>                                                   |
| <b>MASQ #29</b>  | <b>Felt dissatisfied with everything</b>                                                  |
| <b>MASQ #53:</b> | <b>Felt unattractive</b>                                                                  |
| <b>MASQ #64</b>  | <b>Felt inferior to others</b>                                                            |

*Note.* SPS = Social Phobia Scale (Mattick & Clark, 1998), IDD = Inventory to Diagnose Depression (Zimmerman et al., 1986), and MASQ = Mood and Anxiety Symptom Questionnaire (Watson et al., 1995). Bolded versus un-bolded items represent the way in which the two subscales were separated in the TSO models.

**Table S2**

Social Anxiety TSO: means, standard deviations, and correlations among observed variables

| Measure     | Mean | SD  | 1          | 2          | 3          | 4          | 5          | 6          | 7          | 8          | 9          | 10         | 11         | 12         | 13         | 14         | 15         | 16         | 17         | 18  | 19 |
|-------------|------|-----|------------|------------|------------|------------|------------|------------|------------|------------|------------|------------|------------|------------|------------|------------|------------|------------|------------|-----|----|
| SR1_t1 (1)  | .63  | .67 | 1          |            |            |            |            |            |            |            |            |            |            |            |            |            |            |            |            |     |    |
| SR2_t1 (2)  | .95  | .78 | <b>.70</b> | 1          |            |            |            |            |            |            |            |            |            |            |            |            |            |            |            |     |    |
| CSR_t1 (3)  | .85  | 1.5 | <b>.44</b> | <b>.44</b> | 1          |            |            |            |            |            |            |            |            |            |            |            |            |            |            |     |    |
| SR1_t2 (4)  | .62  | .69 | <b>.51</b> | <b>.43</b> | <b>.38</b> | 1          |            |            |            |            |            |            |            |            |            |            |            |            |            |     |    |
| SR2_t2 (5)  | .92  | .77 | <b>.48</b> | <b>.63</b> | <b>.37</b> | <b>.70</b> | 1          |            |            |            |            |            |            |            |            |            |            |            |            |     |    |
| CSR_t2 (6)  | .32  | .96 | <b>.11</b> | <b>.13</b> | <b>.35</b> | <b>.23</b> | <b>.25</b> | 1          |            |            |            |            |            |            |            |            |            |            |            |     |    |
| SR1_t3 (7)  | .57  | .65 | <b>.51</b> | <b>.43</b> | <b>.43</b> | <b>.60</b> | <b>.51</b> | <b>.22</b> | 1          |            |            |            |            |            |            |            |            |            |            |     |    |
| SR2_t3 (8)  | .87  | .87 | <b>.50</b> | <b>.60</b> | <b>.45</b> | <b>.47</b> | <b>.62</b> | <b>.20</b> | <b>.75</b> | 1          |            |            |            |            |            |            |            |            |            |     |    |
| CSR_t3 (9)  | .37  | 1.0 | <b>.17</b> | <b>.19</b> | <b>.24</b> | <b>.35</b> | <b>.33</b> | <b>.37</b> | <b>.38</b> | <b>.42</b> | 1          |            |            |            |            |            |            |            |            |     |    |
| SR1_t4 (10) | .52  | .59 | <b>.45</b> | <b>.41</b> | <b>.38</b> | <b>.62</b> | <b>.48</b> | <b>.27</b> | <b>.52</b> | <b>.54</b> | <b>.25</b> | 1          |            |            |            |            |            |            |            |     |    |
| SR2_t4 (11) | .75  | .78 | <b>.41</b> | <b>.54</b> | <b>.41</b> | <b>.57</b> | <b>.62</b> | <b>.26</b> | <b>.51</b> | <b>.71</b> | <b>.31</b> | <b>.75</b> | 1          |            |            |            |            |            |            |     |    |
| CSR_t4 (12) | .29  | .92 | .06        | .10        | <b>.19</b> | .02        | .15        | <b>.40</b> | <b>.22</b> | <b>.21</b> | <b>.28</b> | <b>.13</b> | <b>.19</b> | 1          |            |            |            |            |            |     |    |
| SR1_t5 (13) | .49  | .64 | <b>.36</b> | <b>.37</b> | <b>.27</b> | <b>.47</b> | <b>.37</b> | .12        | <b>.52</b> | <b>.39</b> | <b>.16</b> | <b>.53</b> | <b>.42</b> | -.02       | 1          |            |            |            |            |     |    |
| SR2_t5 (14) | .72  | .75 | <b>.27</b> | <b>.42</b> | <b>.28</b> | <b>.41</b> | <b>.47</b> | .12        | <b>.41</b> | <b>.48</b> | <b>.17</b> | <b>.48</b> | <b>.62</b> | .05        | <b>.75</b> | 1          |            |            |            |     |    |
| CSR_t5 (15) | .33  | 1.0 | .10        | .07        | <b>.21</b> | <b>.25</b> | <b>.25</b> | <b>.49</b> | <b>.31</b> | <b>.27</b> | <b>.42</b> | <b>.29</b> | <b>.35</b> | <b>.46</b> | <b>.18</b> | <b>.18</b> | 1          |            |            |     |    |
| SR1_t6 (16) | .47  | .60 | <b>.34</b> | <b>.33</b> | <b>.28</b> | <b>.51</b> | <b>.35</b> | <b>.27</b> | <b>.59</b> | <b>.43</b> | <b>.29</b> | <b>.64</b> | <b>.52</b> | <b>.19</b> | <b>.50</b> | <b>.44</b> | <b>.36</b> | 1          |            |     |    |
| SR2_t6 (17) | .65  | .70 | <b>.37</b> | <b>.54</b> | <b>.34</b> | <b>.39</b> | <b>.52</b> | <b>.21</b> | <b>.48</b> | <b>.64</b> | <b>.34</b> | <b>.61</b> | <b>.77</b> | <b>.20</b> | <b>.40</b> | <b>.55</b> | <b>.34</b> | <b>.72</b> | 1          |     |    |
| CSR_t6 (18) | .31  | 1.1 | .04        | .12        | .10        | .00        | .09        | .07        | .12        | .10        | <b>.18</b> | .10        | <b>.16</b> | <b>.32</b> | <b>.17</b> | <b>.18</b> | .10        | <b>.24</b> | <b>.28</b> | 1   |    |
| LSI_b (19)  | 2.37 | .47 | <b>.25</b> | <b>.25</b> | <b>.25</b> | <b>.22</b> | <b>.15</b> | .10        | <b>.28</b> | <b>.23</b> | <b>.16</b> | .12        | .11        | .09        | <b>.14</b> | .08        | .03        | <b>.22</b> | <b>.12</b> | .06 | 1  |

Note. SR = Self-report. CSR = Clinical Severity Ratings. LSI\_b = Baseline interpersonal stress t1 = Time 1, t2 = Time 2, etc. Bolded and underlined:  $p < .01$ . Bolded:  $p < .05$ .

**Table S3**

Depression TSO: means, standard deviations, and correlations among observed variables

| Measure     | Mean | SD  | 1          | 2          | 3          | 4          | 5          | 6          | 7          | 8          | 9          | 10         | 11         | 12         | 13         | 14         | 15         | 16         | 17         | 18         | 19 |
|-------------|------|-----|------------|------------|------------|------------|------------|------------|------------|------------|------------|------------|------------|------------|------------|------------|------------|------------|------------|------------|----|
| SR1_t1 (1)  | 2.02 | .87 | 1          |            |            |            |            |            |            |            |            |            |            |            |            |            |            |            |            |            |    |
| SR2_t1 (2)  | 1.60 | .80 | <b>.84</b> | 1          |            |            |            |            |            |            |            |            |            |            |            |            |            |            |            |            |    |
| CSR_t1 (3)  | .39  | 1.2 | <b>.27</b> | <b>.33</b> | 1          |            |            |            |            |            |            |            |            |            |            |            |            |            |            |            |    |
| SR1_t2 (4)  | 1.90 | .89 | <b>.46</b> | <b>.45</b> | <b>.15</b> | 1          |            |            |            |            |            |            |            |            |            |            |            |            |            |            |    |
| SR2_t2 (5)  | 1.41 | .78 | <b>.38</b> | <b>.44</b> | <b>.17</b> | <b>.81</b> | 1          |            |            |            |            |            |            |            |            |            |            |            |            |            |    |
| CSR_t2 (6)  | .23  | .97 | <b>.11</b> | <b>.20</b> | <b>.14</b> | <b>.39</b> | <b>.35</b> | 1          |            |            |            |            |            |            |            |            |            |            |            |            |    |
| SR1_t3 (7)  | 1.87 | .82 | <b>.38</b> | <b>.39</b> | .11        | <b>.61</b> | <b>.54</b> | <b>.16</b> | 1          |            |            |            |            |            |            |            |            |            |            |            |    |
| SR2_t3 (8)  | 1.41 | .79 | <b>.28</b> | <b>.36</b> | .10        | <b>.49</b> | <b>.51</b> | <b>.13</b> | <b>.83</b> | 1          |            |            |            |            |            |            |            |            |            |            |    |
| CSR_t3 (9)  | .18  | .92 | <b>.21</b> | <b>.17</b> | .07        | <b>.16</b> | <b>.12</b> | <b>.16</b> | <b>.32</b> | <b>.32</b> | 1          |            |            |            |            |            |            |            |            |            |    |
| SR1_t4 (10) | 1.85 | .84 | <b>.42</b> | <b>.42</b> | .08        | <b>.46</b> | <b>.40</b> | .05        | <b>.68</b> | <b>.63</b> | <b>.21</b> | 1          |            |            |            |            |            |            |            |            |    |
| SR2_t4 (11) | 1.38 | .83 | <b>.38</b> | <b>.40</b> | .06        | <b>.42</b> | <b>.39</b> | .04        | <b>.64</b> | <b>.65</b> | <b>.23</b> | <b>.88</b> | 1          |            |            |            |            |            |            |            |    |
| CSR_t4 (12) | .19  | .89 | <b>.21</b> | <b>.21</b> | .08        | <b>.19</b> | <b>.19</b> | .03        | <b>.27</b> | <b>.26</b> | <b>.40</b> | <b>.29</b> | <b>.31</b> | 1          |            |            |            |            |            |            |    |
| SR1_t5 (13) | 1.76 | .76 | <b>.34</b> | <b>.33</b> | .10        | <b>.42</b> | <b>.42</b> | .09        | <b>.47</b> | <b>.35</b> | <b>.22</b> | <b>.57</b> | <b>.51</b> | .11        | 1          |            |            |            |            |            |    |
| SR2_t5 (14) | 1.3  | .73 | <b>.33</b> | <b>.36</b> | <b>.13</b> | <b>.36</b> | <b>.40</b> | .11        | <b>.44</b> | <b>.40</b> | <b>.32</b> | <b>.54</b> | <b>.58</b> | <b>.14</b> | <b>.82</b> | 1          |            |            |            |            |    |
| CSR_t5 (15) | .22  | 1.0 | .05        | .08        | .00        | .07        | .08        | <b>.16</b> | <b>.18</b> | <b>.24</b> | <b>.31</b> | <b>.17</b> | <b>.18</b> | <b>.16</b> | <b>.28</b> | <b>.32</b> | 1          |            |            |            |    |
| SR1_t6 (16) | 1.77 | .74 | <b>.34</b> | <b>.37</b> | .1         | <b>.47</b> | <b>.44</b> | <b>.23</b> | <b>.49</b> | <b>.40</b> | <b>.27</b> | <b>.47</b> | <b>.44</b> | <b>.17</b> | <b>.52</b> | <b>.50</b> | <b>.29</b> | 1          |            |            |    |
| SR2_t6 (17) | 1.33 | .71 | <b>.36</b> | <b>.39</b> | .07        | <b>.43</b> | <b>.39</b> | <b>.20</b> | <b>.43</b> | <b>.41</b> | <b>.27</b> | <b>.47</b> | <b>.48</b> | <b>.13</b> | <b>.48</b> | <b>.50</b> | <b>.29</b> | <b>.82</b> | 1          |            |    |
| CSR_t6 (18) | .31  | 1.2 | <b>.13</b> | <b>.13</b> | -.01       | .09        | .87        | .00        | .04        | .07        | .04        | <b>.20</b> | <b>.18</b> | .07        | <b>.16</b> | <b>.20</b> | <b>.38</b> | <b>.31</b> | <b>.34</b> | 1          |    |
| LSI_b (19)  | 2.37 | .47 | <b>.29</b> | <b>.36</b> | <b>.34</b> | <b>.22</b> | <b>.24</b> | <b>.28</b> | <b>.20</b> | <b>.21</b> | <b>.15</b> | <b>.17</b> | <b>.24</b> | <b>.21</b> | <b>.18</b> | <b>.24</b> | <b>.18</b> | <b>.27</b> | <b>.28</b> | <b>.17</b> | 1  |

Note. SR = Self-report. CSR = Clinical Severity Ratings. LSI\_b = Baseline interpersonal stress t1 = Time 1, t2 = Time 2, etc. Bolded and underlined:  $p < .01$ . Bolded:  $p < .05$ .

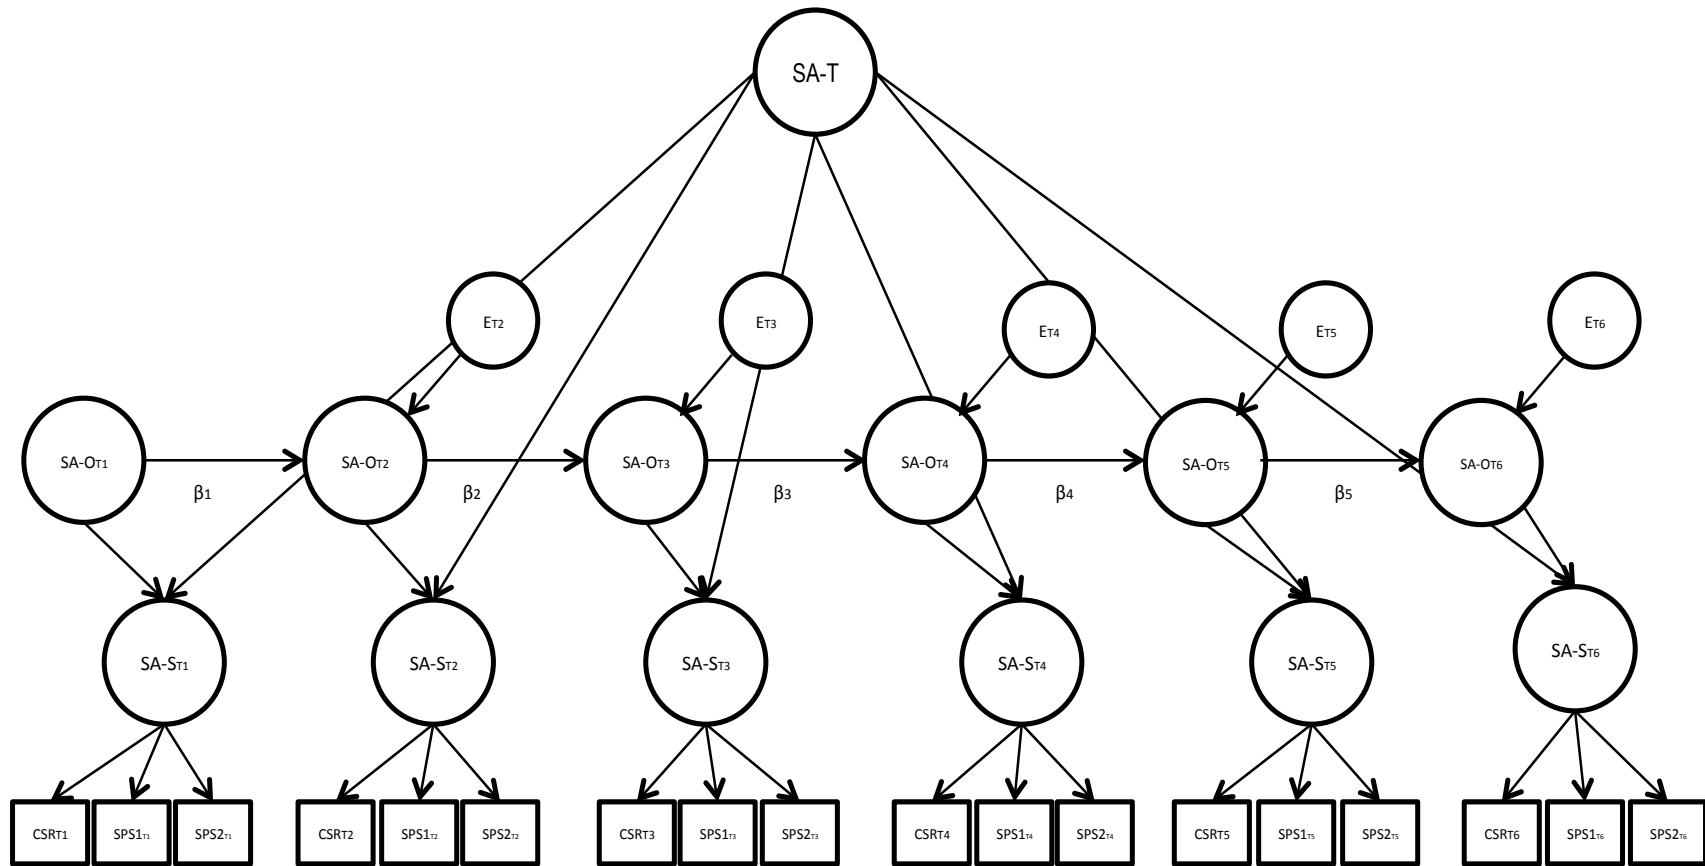

**Figure S1.** Social Anxiety TSO Measurement Model. SA-T = Social Anxiety Trait specific variance. SA-O = Social Anxiety Occasion specific variance. SA-S = Social Anxiety State specific variance. CSR = SCID-based Clinical Severity Ratings. SPS = Social Phobia Scale. T1 = Time 1, T2 = Time 2, etc.
